# Supplementary material for: Hemicellulose content affects the properties of cellulose nanofibrils produced from softwood pulp fibres by LPMO
Source: Royal Society of Chemistry journal article supplement (doi:10.1039/d2gc02237k), 2022-01-01
Supplement: d2gc02237k1.pdf [file d2gc02237k1.pdf]

## Supplementary Information

### Hemicellulose content affects the properties of cellulose nanofibrils produced from softwood pulp fibres by LPMO

Salla Koskela,<sup>a,b</sup> Li Zha,<sup>a</sup> Shennan Wang,<sup>a</sup> Max Yan,<sup>c</sup> and Qi Zhou<sup>a,b\*</sup>

<sup>a</sup> Division of Glycoscience, Department of Chemistry, School of Engineering Sciences in  
Chemistry, Biotechnology and Health, KTH Royal Institute of Technology, AlbaNova  
University Centre, SE-106 91 Stockholm, Sweden

<sup>b</sup> Wallenberg Wood Science Center, Department of Fibre and Polymer Technology, KTH  
Royal Institute of Technology, SE-100 44 Stockholm, Sweden

<sup>c</sup> Department of Applied Physics, KTH Royal Institute of Technology, SE-114 19 Stockholm,  
Sweden

Corresponding Author: Q. Zhou, E-mail: qi@kth.se

This Supplementary Information includes:

**Table S1** Chemical compositions

**Table S2** Physical and mechanical properties of the nanopapers

**Figure S1** SDS-PAGE and Western blot analyses

**Figure S2** FTIR spectra

**Figure S3** XRD patterns

**Figure S4** Histogram of width distribution

**Figure S5** Loss moduli at pH 8 and pH 2

**Table S1.** Chemical compositions of starting material pulp fibres and corresponding *Ti*LPMO9E-oxidised CNFs.

| Material        | Arabinose (%) | Galactose (%) | Glucose (%) | Mannose (%) | Xylose (%) | Glucomannan (%) | Xylan (%) | Total hemicellulose (%) | Cellulose (%) | Klason lignin (%) |
|-----------------|---------------|---------------|-------------|-------------|------------|-----------------|-----------|-------------------------|---------------|-------------------|
| Dissolving pulp | 0.0           | 0.0           | 91.8        | 1.9         | 1.6        | 2.5             | 1.7       | 4.2                     | 91.2          | 3.1               |
| Kraft pulp      | 0.1           | 0.0           | 79.4        | 8.1         | 5.1        | 10.8            | 5.2       | 16.0                    | 76.7          | 3.6               |
| Dissolving CNFs | 0.0           | 0.0           | 82.8        | 1.7         | 1.5        | 2.3             | 1.6       | 3.9                     | 82.2          | n/a               |
| Kraft CNFs      | 0.0           | 0.0           | 70.6        | 7.7         | 4.6        | 10.2            | 4.6       | 14.8                    | 68.1          | n/a               |

**Table S2.** Physical and average mechanical properties of nanopapers prepared from *Ti*LPMO9E-oxidised dissolving and kraft CNFs.<sup>a</sup>

| Material        | Porosity (%) | Density (g/cm <sup>3</sup> ) | Young's modulus (GPa) | Tensile strength (MPa) | Strain-to-failure (%) | Work of fracture (MJ/m <sup>3</sup> ) |
|-----------------|--------------|------------------------------|-----------------------|------------------------|-----------------------|---------------------------------------|
| Dissolving CNFs | 12.9         | 1.31                         | 11.1 (0.4)            | 138 (8)                | 5.3 (0.2)             | 5.1 (0.4)                             |
| Kraft CNFs      | 5.5          | 1.42                         | 16.9 (0.6)            | 260 (13)               | 6.3 (0.5)             | 10.6 (1.4)                            |

<sup>a</sup> The values in parentheses represent standard deviation of four technical replicates.

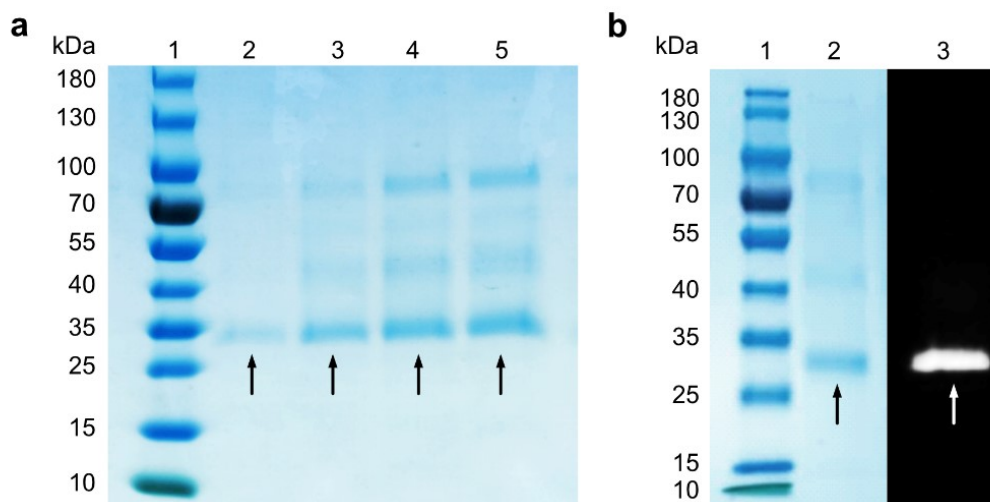

**Figure S1.** Production of *T. terrestris* TtLPMO9E in *P. pastoris*. (a) SDS-PAGE where lane 1 shows a size marker protein ladder, and lanes 2–5 contain *P. pastoris* culture supernatant from 1 to 4 days of methanol induction. (b) SDS-PAGE and Western blot analyses of purified TtLPMO9E. Lane 1 shows a size marker protein ladder, and lanes 2 and 3 contain the LPMO. The bands indicated by arrows correspond to the heterologously expressed enzyme.

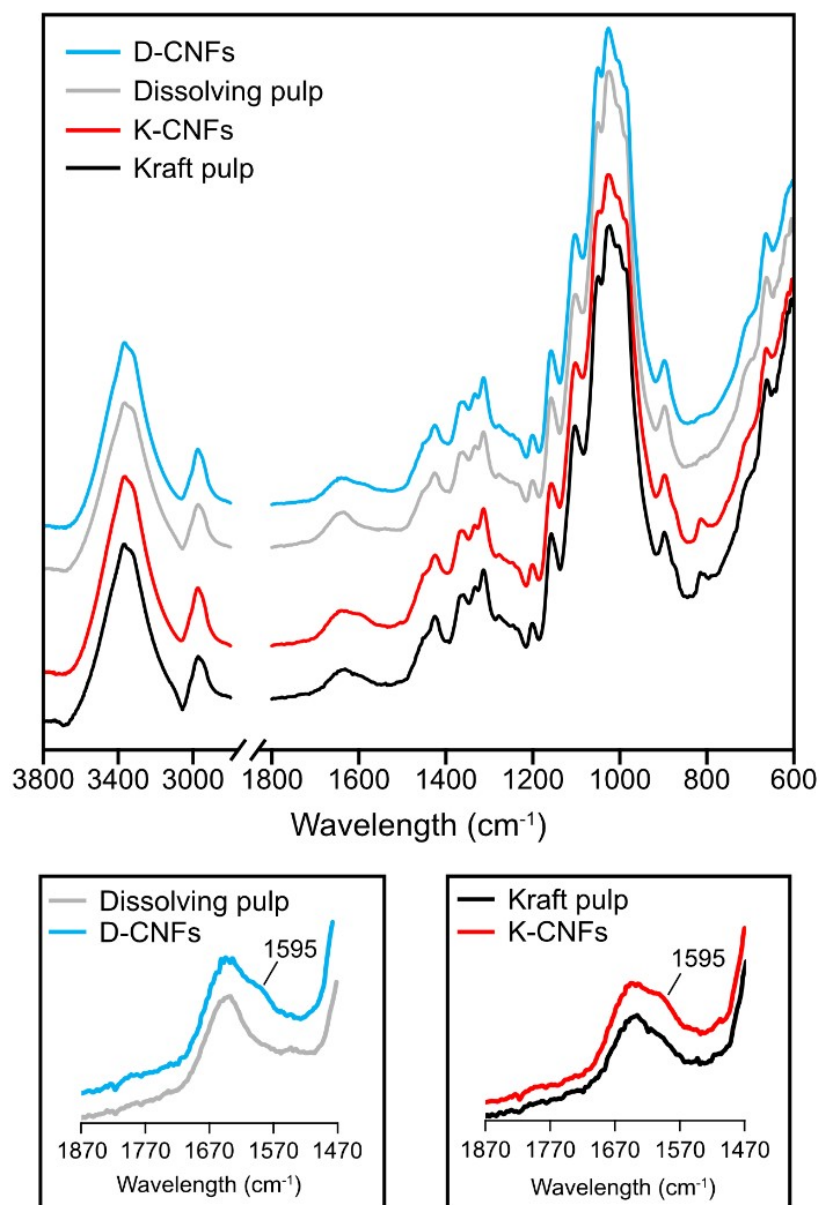

**Figure S2.** FTIR spectra of D-CNFs and K-CNFs, as compared to the starting dissolving pulp and kraft pulp fibres. The peak appeared at 1595 cm<sup>-1</sup> in the *Ti*LPMO9E-oxidised samples corresponds to the carboxylate –COONa. The spectra have been normalised at 1028 cm<sup>-1</sup>, which corresponds to the pyranose ring ether vibration of cellulose.

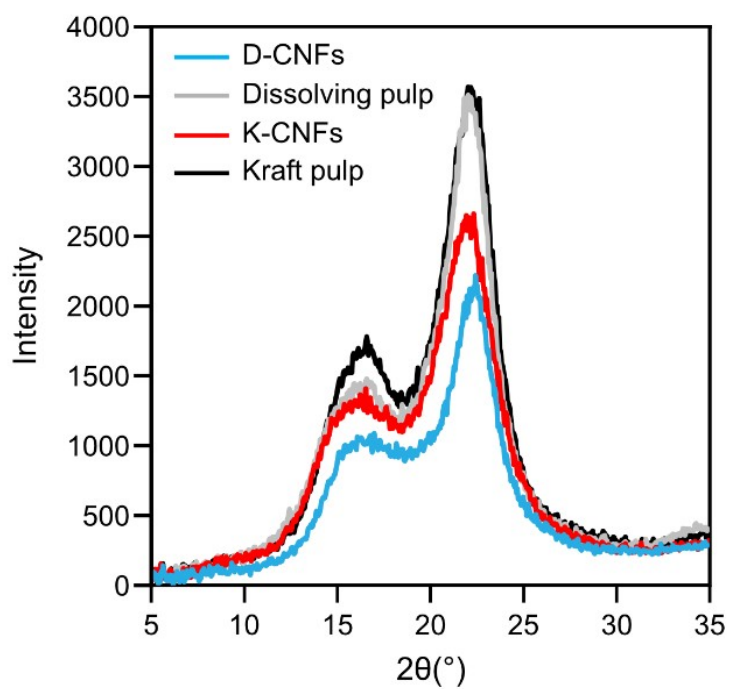

**Figure S3.** XRD patterns of D-CNFs and K-CNFs, as compared to the starting dissolving pulp and kraft pulp fibres.

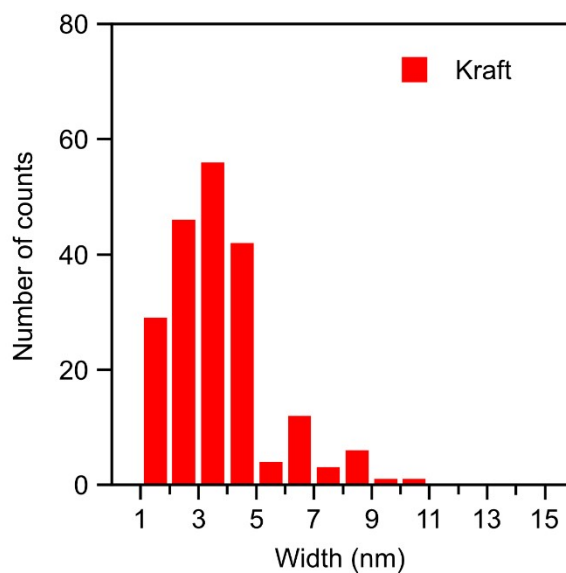

**Figure S4.** Histogram for the width distribution of K-CNFs. The histogram was obtained from the AFM images.

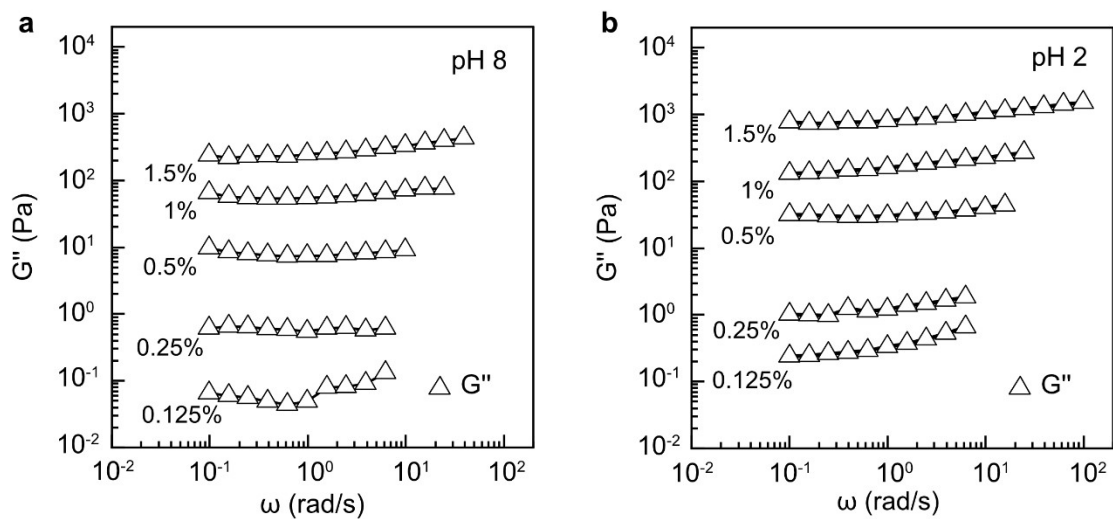

**Figure S5.** The loss moduli ( $G''$ ) of the *TtLPMO9E*-oxidised K-CNFs suspensions. The loss modulus ( $G''$ ) is presented as a function of frequency. The measurements were conducted at 25 °C in (a) aqueous dispersion at pH 8, and (b) after cross-linking into hydrogels at pH 2.
